# Supplementary material
Source: MDPI journal article supplement (https://www.mdpi.com/2073-4395/13/12/3018)
Supplement: s1 [file s1 › Figure S1.pdf]

XC22 TR4 (at flowering stage)

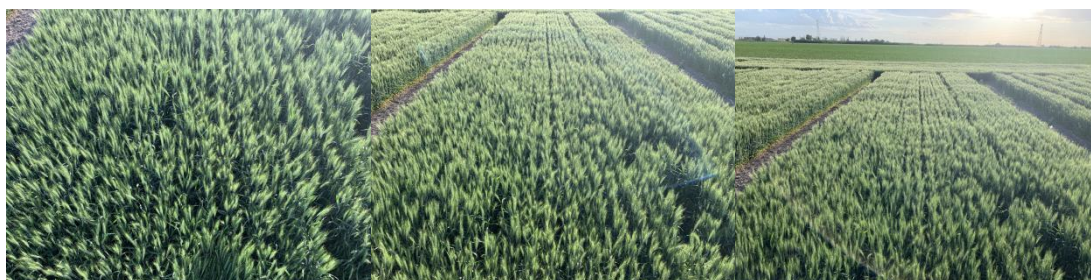

XC22 TR6 (at booting stage)

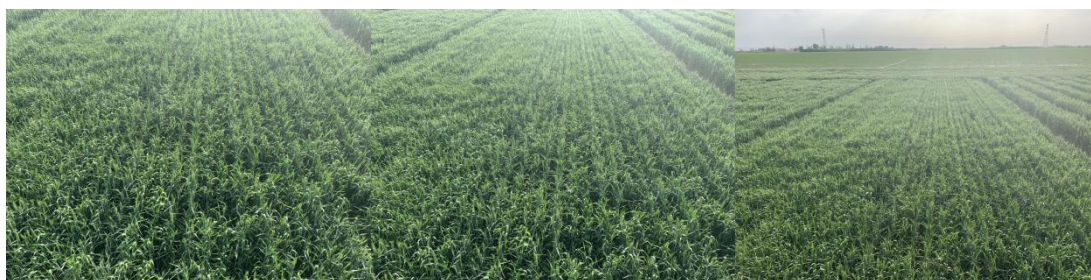

XC22 TRL6 (at booting stage)

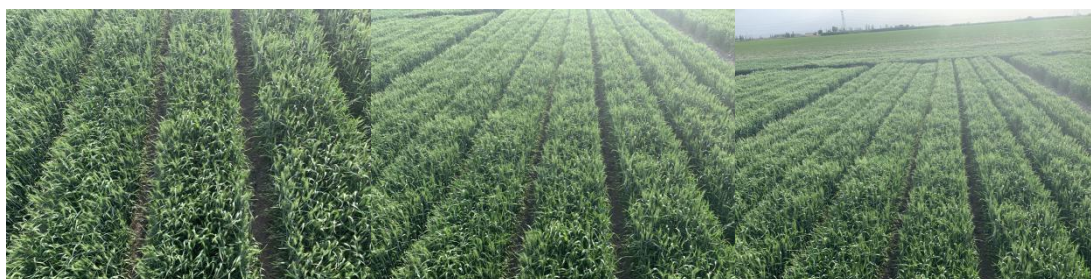

XC22 TRS6 (at flowering stage)

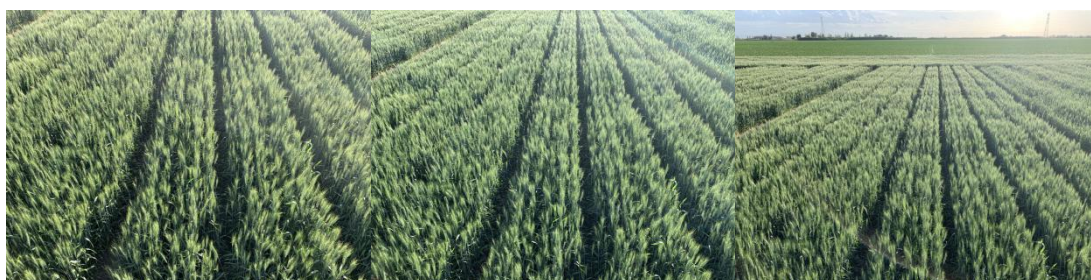

XC44 TR4 (at booting stage)

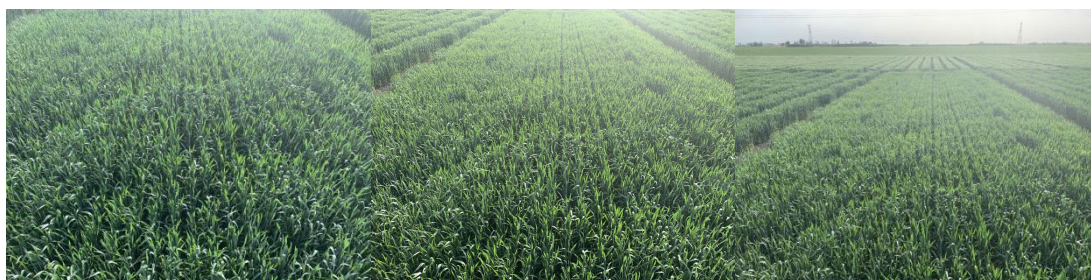

XC44 TR6 (at flowering stage)

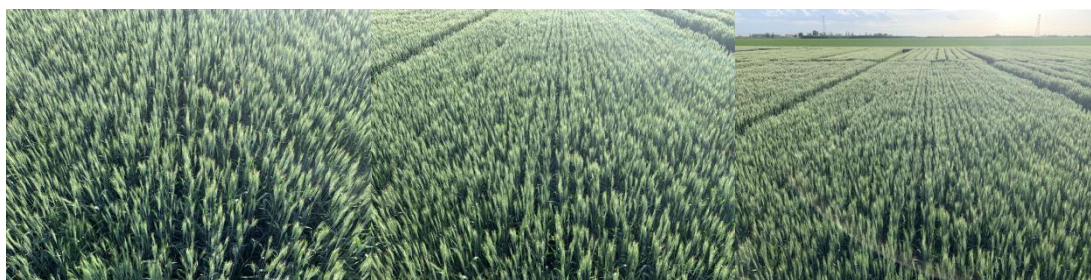

XC44 TRL6 (at booting stage)

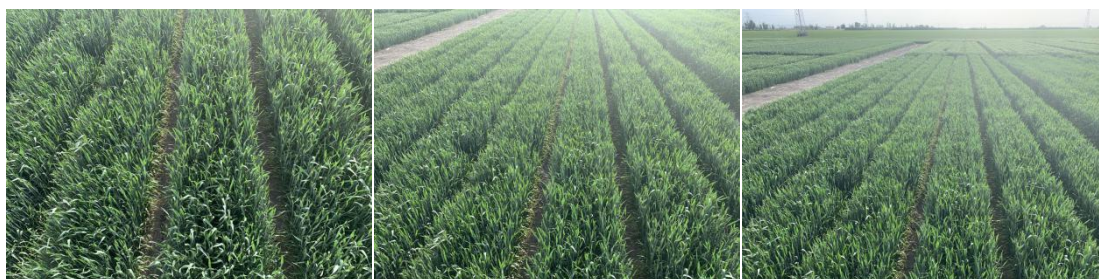

XC44 TRS6 (at booting stage)

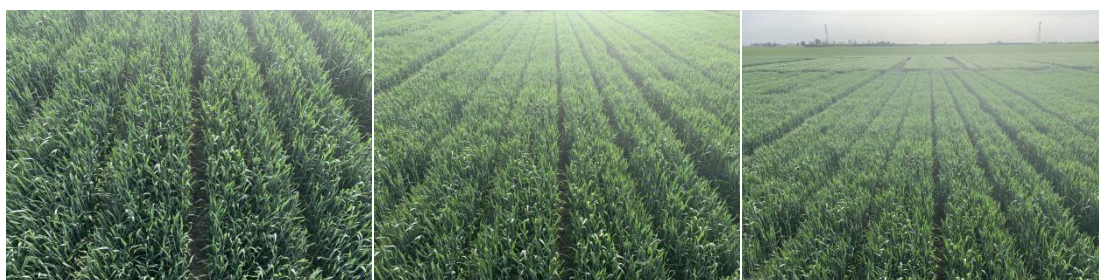

Figure S1. Photos of plant growth in the field
