# Supplementary material
Source: MDPI journal article supplement (https://www.mdpi.com/2073-4395/13/12/3018)
Supplement: s1 [file s1 › Figure S2.pdf]

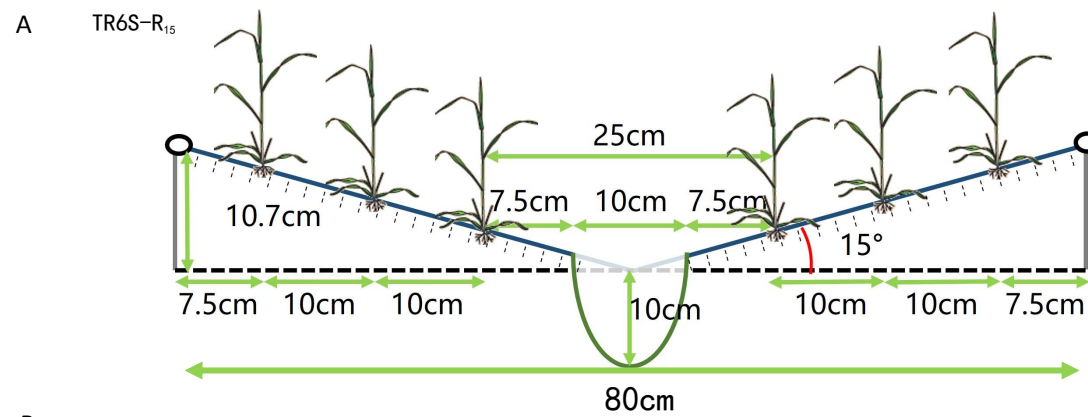

B

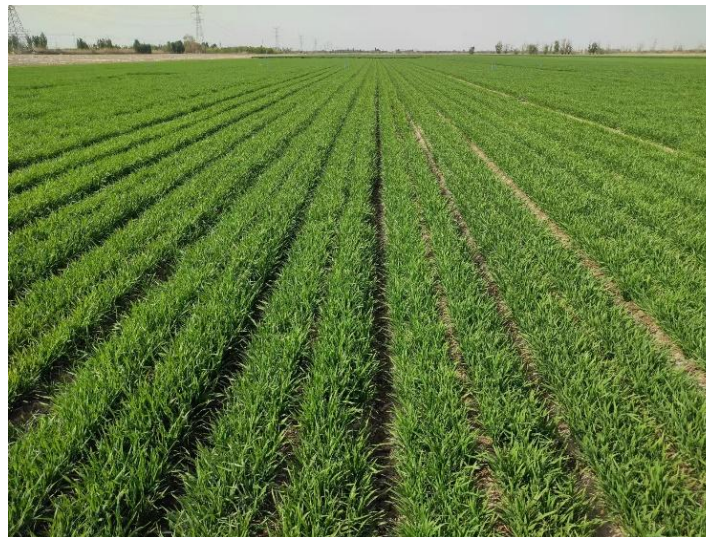

Figure S2. Schematic diagram of slope drip irrigation pattern. A: Schematic diagram; B: Pre experimental field photos
